# Supplementary material
Source: HighWire-hosted journal article supplement (https://www.cmajopen.ca/highwire/filestream/81282/field_highwire_adjunct_files/0/2018-0173-1-at.pdf)
Supplement: 2018-0173-1-at.pdf [file 2018-0173-1-at.pdf]

1 **Appendix 1 (as supplied by the authors):** Ontario hospitals designated as teaching hospitals

| <b>Institution Name</b>                                    | <b>Location</b> | <b>LHIN #</b> | <b>LHIN Name</b>                 |
|------------------------------------------------------------|-----------------|---------------|----------------------------------|
| Bridgepoint Hospital                                       | Toronto         | 7             | Toronto Central                  |
| Centre For Addiction and Mental Health, Detox              | Toronto         | 7             | Toronto Central                  |
| Centre For Addiction and Mental Health                     | Toronto         | 7             | Toronto Central                  |
| Centre For Addiction and Mental Health, Arf                | Toronto         | 7             | Toronto Central                  |
| Centre For Addiction and Mental Health, Clarke             | Toronto         | 7             | Toronto Central                  |
| Centre For Addiction and Mental Health, Donwood            | Toronto         | 7             | Toronto Central                  |
| Centre For Addiction and Mental Health, Queen              | Toronto         | 7             | Toronto Central                  |
| Children's Hospital of Eastern Ontario                     | Ottawa          | 11            | Champlain                        |
| Hamilton Detoxification Centre                             | Hamilton        | 4             | Niagara Hamilton Haldimand Brant |
| Hamilton Health Sciences Corporation, Chedoke              | Hamilton        | 4             | Niagara Hamilton Haldimand Brant |
| Hamilton Health Sciences Corporation, General              | Hamilton        | 4             | Niagara Hamilton Haldimand Brant |
| Hamilton Health Sciences Corporation, Juravinski           | Hamilton        | 4             | Niagara Hamilton Haldimand Brant |
| Hamilton Health Sciences Corporation, McMaster             | Hamilton        | 4             | Niagara Hamilton Haldimand Brant |
| Hamilton Health Sciences Corporation, St. Peter's          | Hamilton        | 4             | Niagara Hamilton Haldimand Brant |
| Hamilton Health Sciences Corporation, West End Urgent Care | Hamilton        | 4             | Niagara Hamilton Haldimand Brant |
| Hamilton Health Sciences Corporation, Gen, Regional Rehab  | Hamilton        | 4             | Niagara Hamilton Haldimand Brant |
| Hamilton Health Sciences Corporation, West Lincoln         | Grimsby         | 4             | Niagara Hamilton Haldimand Brant |
| Hamilton Regional Cancer Centre                            | Hamilton        | 4             | Niagara Hamilton Haldimand Brant |
| Health Sciences North, General                             | Sudbury         | 13            | North East                       |
| Health Sciences North, Laurentian                          | Sudbury         | 13            | North East                       |
| Health Sciences North, Memorial                            | Sudbury         | 13            | North East                       |
| Hopital Montfort                                           | Ottawa          | 11            | Champlain                        |
| Hopital Regional De Sudbury, Laurentian                    | Sudbury         | 13            | North East                       |

|                                                           |                 |    |                      |
|-----------------------------------------------------------|-----------------|----|----------------------|
| Hospital For Sick Children                                | Toronto         | 7  | Toronto Central      |
| Hotel Dieu Detoxification                                 | Kingston        | 10 | South East           |
| Hotel Dieu Hospital, Kingston                             | Kingston        | 10 | South East           |
| Kingston General Hospital                                 | Kingston        | 10 | South East           |
| Kingston Regional Cancer Centre                           | Kingston        | 10 | South East           |
| London Health Sciences Centre, South Street               | London          | 2  | South West           |
| London Health Sciences Centre, University Hospital        | London          | 2  | South West           |
| London Health Sciences Centre, Victoria Hospital          | London          | 2  | South West           |
| London Health Sciences Centre, Victoria South             | London          | 2  | South West           |
| London Regional Cancer Centre                             | London          | 2  | South West           |
| Northeastern Ontario Cancer Treat Centre                  | Sudbury         | 13 | North East           |
| Ontario Shores Centre For Mental Health Sciences          | Whitby          | 9  | Central East         |
| Ottawa Hospital, Civic Site                               | Ottawa          | 11 | Champlain            |
| Ottawa Hospital, General Site                             | Ottawa          | 11 | Champlain            |
| Ottawa Hospital, Riverside Site                           | Ottawa          | 11 | Champlain            |
| Ottawa Hospital, The Rehab Centre                         | Ottawa          | 11 | Champlain            |
| Ottawa Regional Cancer Centre (Civic Division)            | Ottawa          | 11 | Champlain            |
| Ottawa Regional Cancer Centre (Gen Division)              | Ottawa          | 11 | Champlain            |
| Penetanguishene Mental Healthcare Oakridge Division       | Penetanguishene | 12 | North Simcoe Muskoka |
| Penetanguishene Mental Healthcare Regional Division       | Penetanguishene | 12 | North Simcoe Muskoka |
| Providence Care Centre, Mental Health Services            | Kingston        | 10 | South East           |
| Providence Care Centre, St. Mary's of the Lake            | Kingston        | 10 | South East           |
| Providence Continuing Care Centre, Kingston Mental Health | Kingston        | 10 | South East           |
| Royal Ottawa Health Care Group                            | Ottawa          | 11 | Champlain            |
| Royal Ottawa Health Care Group, Mental Health             | Ottawa          | 11 | Champlain            |
| Royal Ottawa Health Care Group, Psych Site                | Ottawa          | 11 | Champlain            |
| Royal Ottawa Health Care Group, Brockville Mental Health  | Brockville      | 10 | South East           |

|                                                            |             |    |                                     |
|------------------------------------------------------------|-------------|----|-------------------------------------|
| Sinai Health System, Bridgepoint Site                      | Toronto     | 7  | Toronto Central                     |
| Sinai Health System, Mount Sinai Site                      | Toronto     | 7  | Toronto Central                     |
| St John's Rehabilitation Hospital                          | Toronto     | 7  | Toronto Central                     |
| St Joseph's Community Health Centre                        | Hamilton    | 4  | Niagara Hamilton<br>Haldimand Brant |
| St Joseph's Health Care System,<br>Hamilton, Mental Health | Hamilton    | 4  | Niagara Hamilton<br>Haldimand Brant |
| St Joseph's Health Care System,<br>Hamilton                | Hamilton    | 4  | Niagara Hamilton<br>Haldimand Brant |
| St Joseph's Hospital Detox Centre                          | Hamilton    | 4  | Niagara Hamilton<br>Haldimand Brant |
| St Michael's Detoxification                                | Toronto     | 7  | Toronto Central                     |
| St Michael's Hospital                                      | Toronto     | 7  | Toronto Central                     |
| St. Joseph's Health Care, London                           | London      | 2  | South West                          |
| St. Joseph's Health Care, London,<br>Detox Centre          | London      | 2  | South West                          |
| St. Joseph's Health Care, London,<br>London Mental Health  | London      | 2  | South West                          |
| St. Joseph's Health Care, London,<br>Parkwood              | London      | 2  | South West                          |
| St. Joseph's Health Care, London, St.<br>Thomas            | St Thomas   | 2  | South West                          |
| Sunnybrook & Women's College<br>Health Sciences, Women's   | Toronto     | 7  | Toronto Central                     |
| Sunnybrook Health Sciences Centre                          | Toronto     | 7  | Toronto Central                     |
| Sunnybrook Health Sciences Centre,<br>Orthopaedic          | Toronto     | 7  | Toronto Central                     |
| Sunnybrook Health Sciences Centre,<br>St. John's           | Toronto     | 7  | Toronto Central                     |
| Thunder Bay Regional Cancer Centre                         | Thunder Bay | 14 | North West                          |
| Thunder Bay Regional Health Sciences                       | Thunder Bay | 14 | North West                          |
| Thunder Bay Regional Health, Port<br>Arthur                | Thunder Bay | 14 | North West                          |
| Toronto Rehabilitation Institute, Bickle<br>Centre         | Toronto     | 7  | Toronto Central                     |
| Toronto Rehabilitation Institute,<br>Hillcrest/Un          | Toronto     | 7  | Toronto Central                     |
| Toronto Rehabilitation Institute,<br>Lyndhurst             | Toronto     | 7  | Toronto Central                     |
| Toronto Sunnybrook Regional Cancer<br>Centre               | Toronto     | 7  | Toronto Central                     |
| University Health Network                                  | Toronto     | 7  | Toronto Central                     |

|                                                    |                 |    |                                  |
|----------------------------------------------------|-----------------|----|----------------------------------|
| University Health Network, Bickle Centre           | Toronto         | 7  | Toronto Central                  |
| University Health Network, General Site            | Toronto         | 7  | Toronto Central                  |
| University Health Network, Hillcrest/University    | Toronto         | 7  | Toronto Central                  |
| University Health Network, Lyndhurst Site          | Toronto         | 7  | Toronto Central                  |
| University Health Network, Princess Marg           | Toronto         | 7  | Toronto Central                  |
| University Health Network, Western Site            | Toronto         | 7  | Toronto Central                  |
| University of Ottawa Heart Institute               | Ottawa          | 11 | Champlain                        |
| Waypoint Centre For Mental Health Care, Provincial | Penetanguishene | 12 | North Simcoe Muskoka             |
| Waypoint Centre For Mental Health Care, Regional   | Penetanguishene | 12 | North Simcoe Muskoka             |
| West Lincoln Memorial Hospital                     | Grimsby         | 4  | Niagara Hamilton Haldimand Brant |
| Whitby Mental Health Centre                        | Whitby          | 9  | Central East                     |
| Women's College Hospital                           | Toronto         | 7  | Toronto Central                  |
| Women's Own Detox Centre                           | Toronto         | 7  | Toronto Central                  |

1 LHIN=Local Health Integration Network
